# Supplementary material for: Primary Care Professionals’ Empathy and Its Relationship to Approaching Patients with Risky Alcohol Consumption
Source: MDPI journal article supplement (doi:10.3390/healthcare12020262), 2024-01-19
Supplement: s1 [file s1]

## Supplementary Material. Collaborative group ALCO-AP20

### Participants

Alejandro Camacho Franco  
Alicia Moscoso Jara  
Alicia Valenzuela Gómez  
Ana Belen Carmona Casado  
Ana González de la Rubia  
Ana Morilla Roldán  
Ana Roldan Villalobos  
Antonia Carmona Priego  
Antonia Toledano Medina  
Antonio León Dugo  
Carmen Jurado Porcuna  
Carmen Rodríguez Buza  
Carmen Sánchez Aguilar  
Celia Pérula Jiménez  
Cristina Rojas Prats  
Cristina Ruiz Rull  
Elena De Rodrigo Tobías  
Elena María De Dios González  
Enrique Martínez Martínez  
Esperanza Romero Rodríguez  
Estrella Castro Martín  
Eva María Sánchez Cañete  
Fátima Bravo Ábalos  
Fernando Jesús González Martínez  
Francisco López Cañas  
Gertrudis Montes Redondo  
Helena Cruz Terrón

### Center

DCCU Córdoba  
Peñarroya-Pueblonuevo  
Occidente Azahara  
IMIBIC  
Villarrubia  
Pozoblanco  
Carlos Castilla del Pino  
Levante Norte  
Montoro  
Aeropuerto  
Levante Norte  
Carlota  
Occidente Azahara  
Montoro  
La Carlota  
Montoro  
Almodóvar  
Bujalance  
Hospital Universitario de Villalba  
Carlos Castilla del Pino  
Occidente Azahara  
Polígono Guadalquivir  
Hospital Universitario Reina Sofía  
Posadas  
El Higuerón  
Santa Rosa  
Aeropuerto

|                                         |                   |
|-----------------------------------------|-------------------|
| <b>Inés Gutiérrez París</b>             | Almodóvar         |
| <b>Isabel Jabato Moreno</b>             | Aeropuerto        |
| <b>Jesús González Lama</b>              | Cabra             |
| <b>Jesús Villar</b>                     | Poniente          |
| <b>José Angel Fernández García</b>      | Villarrubia       |
| <b>José Tomás Linares</b>               | Sector Sur        |
| <b>Juan Baleato Gómez</b>               | Villarrubia       |
| <b>Juan José León Serrano</b>           | Levante Norte     |
| <b>Juan Marcos Baños</b>                | Villafranca       |
| <b>Julia Hervás Jerez</b>               | Sector Sur        |
| <b>Laura Aranda Domínguez</b>           | Sector sur        |
| <b>Laura Martín Guerra</b>              | Aeropuerto        |
| <b>Manuel Marín Agredano</b>            | Pozoblanco        |
| <b>Manuela Urbano Priego</b>            | Occidente Azahara |
| <b>Margarita Fernández Poyatos</b>      | Levante norte     |
| <b>María Angeles Quesada Román</b>      | Lucano            |
| <b>María Bello Castro</b>               | Montilla          |
| <b>María Carmen Luna Moreno</b>         | Cordoba           |
| <b>María Carmen Ocaña Rodríguez</b>     | Baena             |
| <b>María del Carmen Castillo</b>        | Occidente Azahara |
| <b>Maria del Carmen Membiela Jurado</b> | Sector Sur        |
| <b>María Dolores López Espejo</b>       | Occidente Azahara |
| <b>María Isabel López Estepa</b>        | Aeropuerto        |
| <b>María Luisa Soria Cabrera</b>        | Villarrubia       |
| <b>María Luisa Trigueros Guerra</b>     | Occidente Azahara |
| <b>María Sierra Henares</b>             |                   |
| <b>María Reyes Martínez Guillén</b>     | Aeropuerto        |
| <b>Maria Carmen Membiela Jurado</b>     | Luque             |
| <b>Marina Guijarro Blanco</b>           | Poniente          |
| <b>Marta Espejo Marín</b>               | Occidente Azahara |
| <b>Miguel Muñoz Álamo</b>               | Occidente Azahara |
| <b>Miguel Relano Pedregal</b>           | Villafranca       |

|                                            |                     |
|--------------------------------------------|---------------------|
| <b>Nazaret María Vargas Berni</b>          | Aeropuerto          |
| <b>Nazaret Morales Delgado</b>             | Poniente            |
| <b>Raquel Aguilera Muñoz</b>               | Córdoba             |
| <b>Raquel Gracia Rodríguez</b>             | Bujalance           |
| <b>Raquel Sauces Carrillo</b>              | Bujalance           |
| <b>Rocío Luna Cuevas</b>                   | Sector Sur          |
| <b>Rodrigo Ruz Muriel</b>                  | Área Sur de Córdoba |
| <b>Rodrigo Sebastian Fernández Márquez</b> | Lucena              |
| <b>Rosalía Serrano Berni</b>               | Occidente Azahara   |
| <b>Sharon Stefany Marín González</b>       | Santa Rosa          |
| <b>Sofía Chico Tierno</b>                  | Occidente Azahara   |
| <b>Tránsito Porras Castro</b>              | Villarrubia         |
